# Supplementary material for: A Short ERAP2 That Binds IRAP Is Expressed in Macrophages Independently of Gene Variation
Source: MDPI journal article supplement (doi:10.3390/ijms23094961), 2022-04-29
Supplement: s1 [file s1]

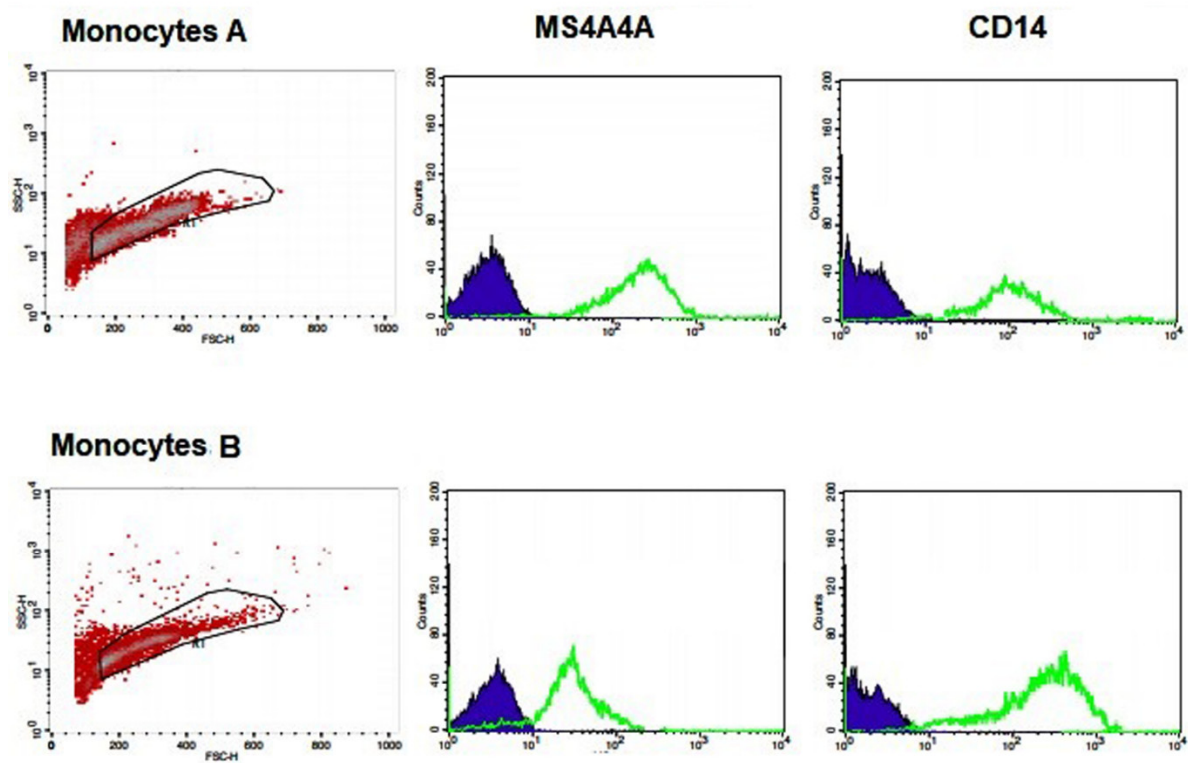

Representative flow cytometry manual gating analysis

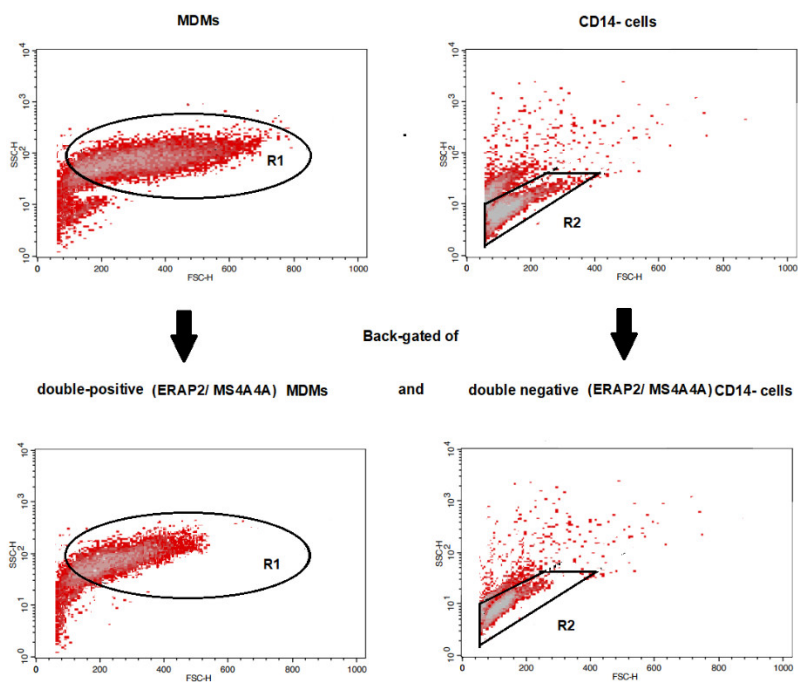

**Figure S2. Monocyte/macrophages cytofluorimetric analysis.** Upper panel: Representative analysis of the expression of MS4A4A and CD14 in monocytes genotyped as A/A (A) or G/G (B) at rs2248374. Lower panel: gating of the double positive ERAP2/MS4A4A in CD14+ (left) or CD14 neg (right) PBMCs.

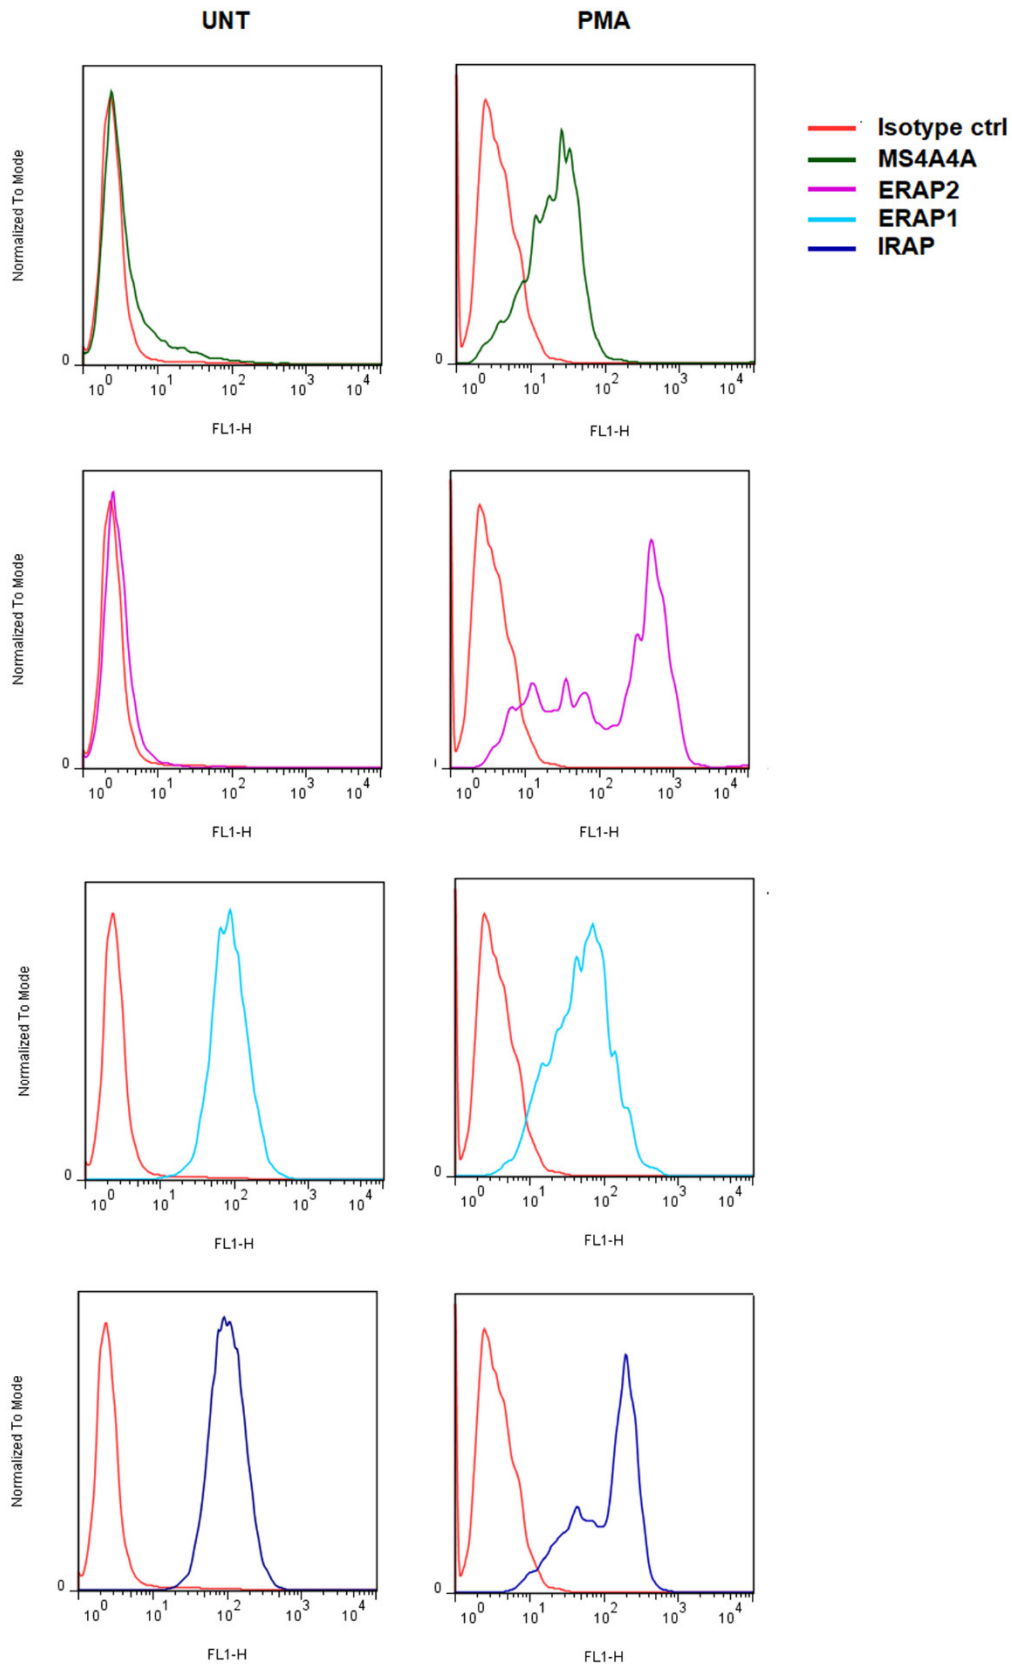

**Figure S3. U937 surface expression of MS4A4A, ERAP2, ERAP1 and IRAP.** Cytofluorimetric analysis of the expression of MS4A4A (upper panels), ERAP2 (second panels), ERAP1 (third panels) and IRAP in untreated (lower panels) (left panels) and PMA-treated (right panels) U937 cells.

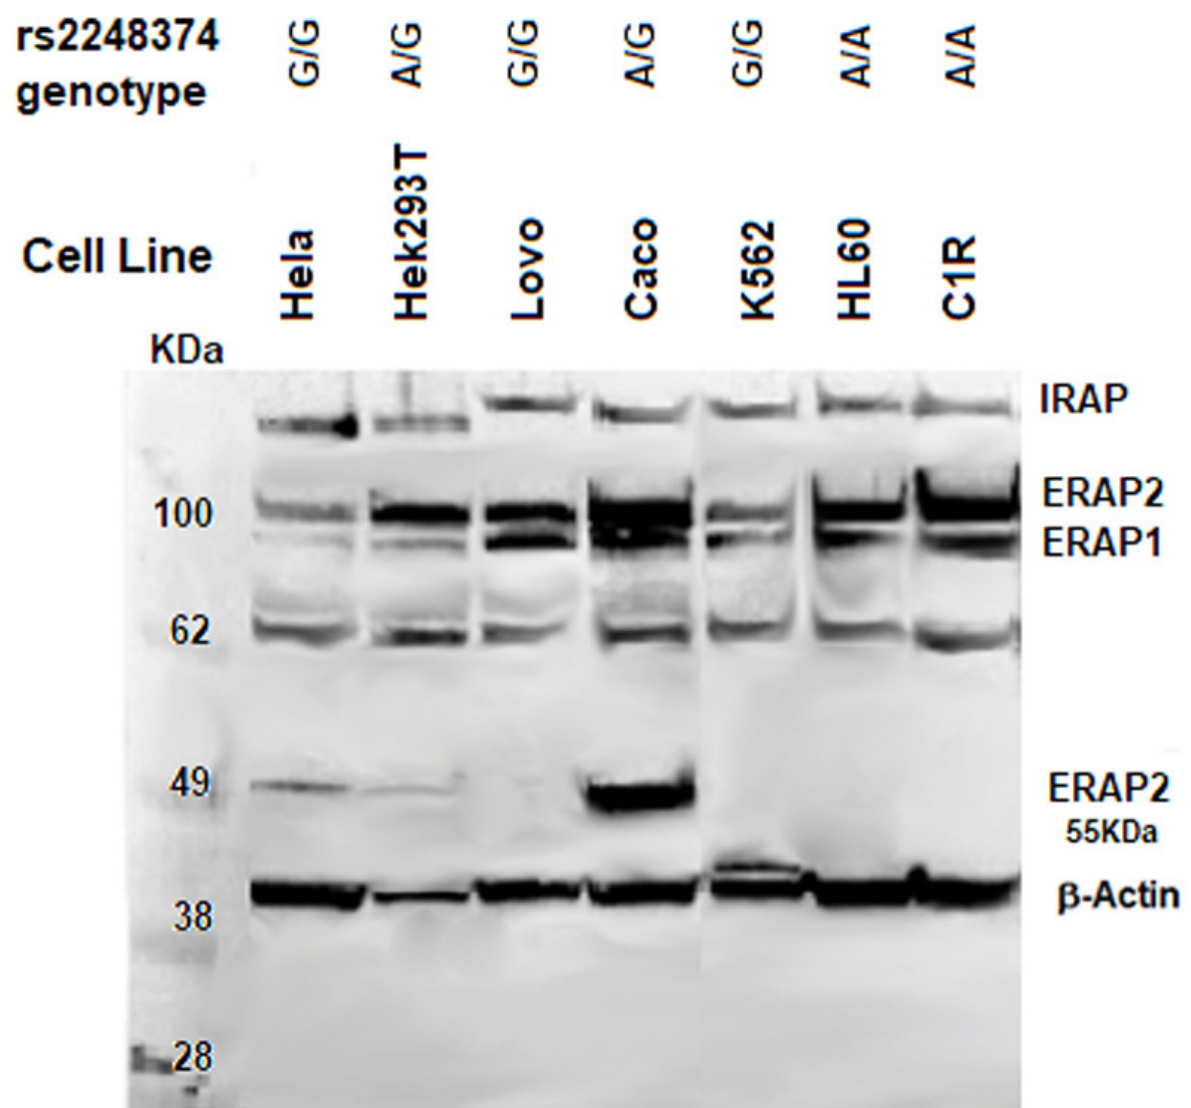

**Figure S4. Expression of ERAP2, ERAP1 and IRAP in selected cancer cell lines genotyped for the SNP rs2248374.** The respective rs2248374 genotypes are indicated at the top of the image.
